# Supplementary material for: Light-emitting analogues based on triphenylamine modified quinoxaline and pyridine[2,3-b]pyrazine exhibiting different mechanochromic luminescence
Source: Royal Society of Chemistry journal article supplement (doi:10.1039/d1nj01350e), 2021-01-01
Supplement: d1nj01350e1.pdf [file d1nj01350e1.pdf]

# **Light-emitting analogues based on triphenylamine modified quinoxaline and pyridine[2,3-*b*]pyrazine exhibiting different mechanochromic luminescence**

Yuxi Ge<sup>a</sup>, Bin Huang<sup>a,b,\*</sup>

<sup>a</sup> *College of Life Sciences and Chemistry, Jiangsu Key Laboratory of Biofunctional Molecule, Institute of New Materials for Vehicles, Jiangsu Second Normal University, Nanjing, 210013, P. R. China*

<sup>b</sup> *State Key Laboratory of Bioelectronics, Jiangsu Key Laboratory for Biomaterials and Devices, School of Biological Science and Medical Engineering, Southeast University, Nanjing 210096, P. R. China*

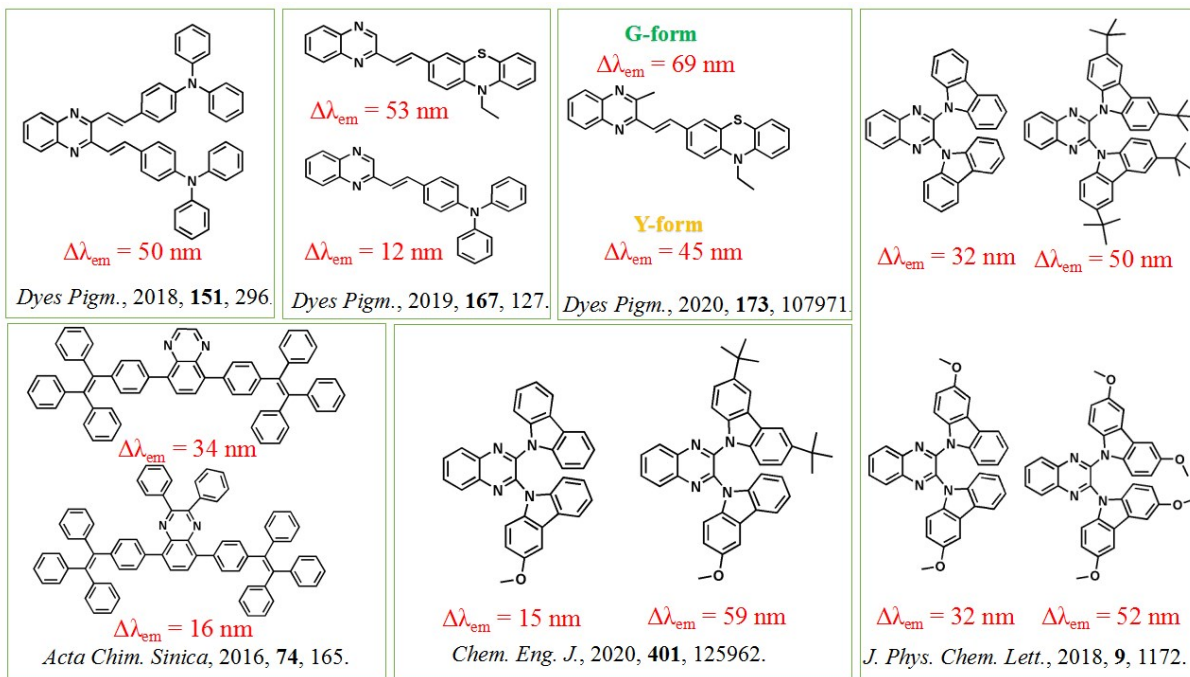

**Fig. S1** MCL properties of quinoxaline-based fluorophores

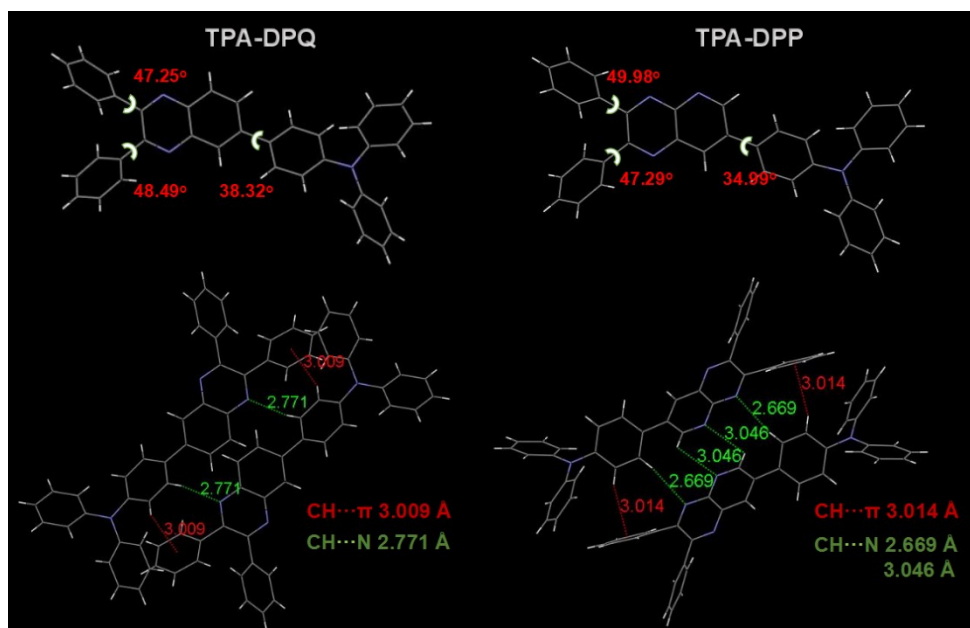

**Fig. S2** The single crystal structures and molecular interactions of TPA-DPQ and TPA-DPP at 296 K
